# Supplementary material for: Highly transparent electrorheological fluids of silica nanoparticles: the effect of urea modification
Source: Royal Society of Chemistry journal article supplement (doi:10.1039/c6tc02154a), 2016-01-01
Supplement: c6tc02154a1.pdf [file c6tc02154a1.pdf]

Supporting Information:

### Highly transparent electrorheological fluids of silica nanoparticles: the effect of urea modification

Bo Nan Hao<sup>a</sup>, Yun Xia Guo<sup>a</sup>, Ying Dan Liu<sup>a,\*</sup>, Li-Min Wang<sup>a</sup>, Hyoung Jin Choi<sup>b,\*</sup>

<sup>a</sup>State Key Laboratory of Metastable Materials Science and Technology, Yanshan University, Qinhuangdao 066004, China. E-mail: ydliu@ysu.edu.cn

<sup>b</sup>Department of Polymer Science and Engineering, Inha University, Incheon 402-751, Korea. E-mail: hjchoi@inha.ac.kr

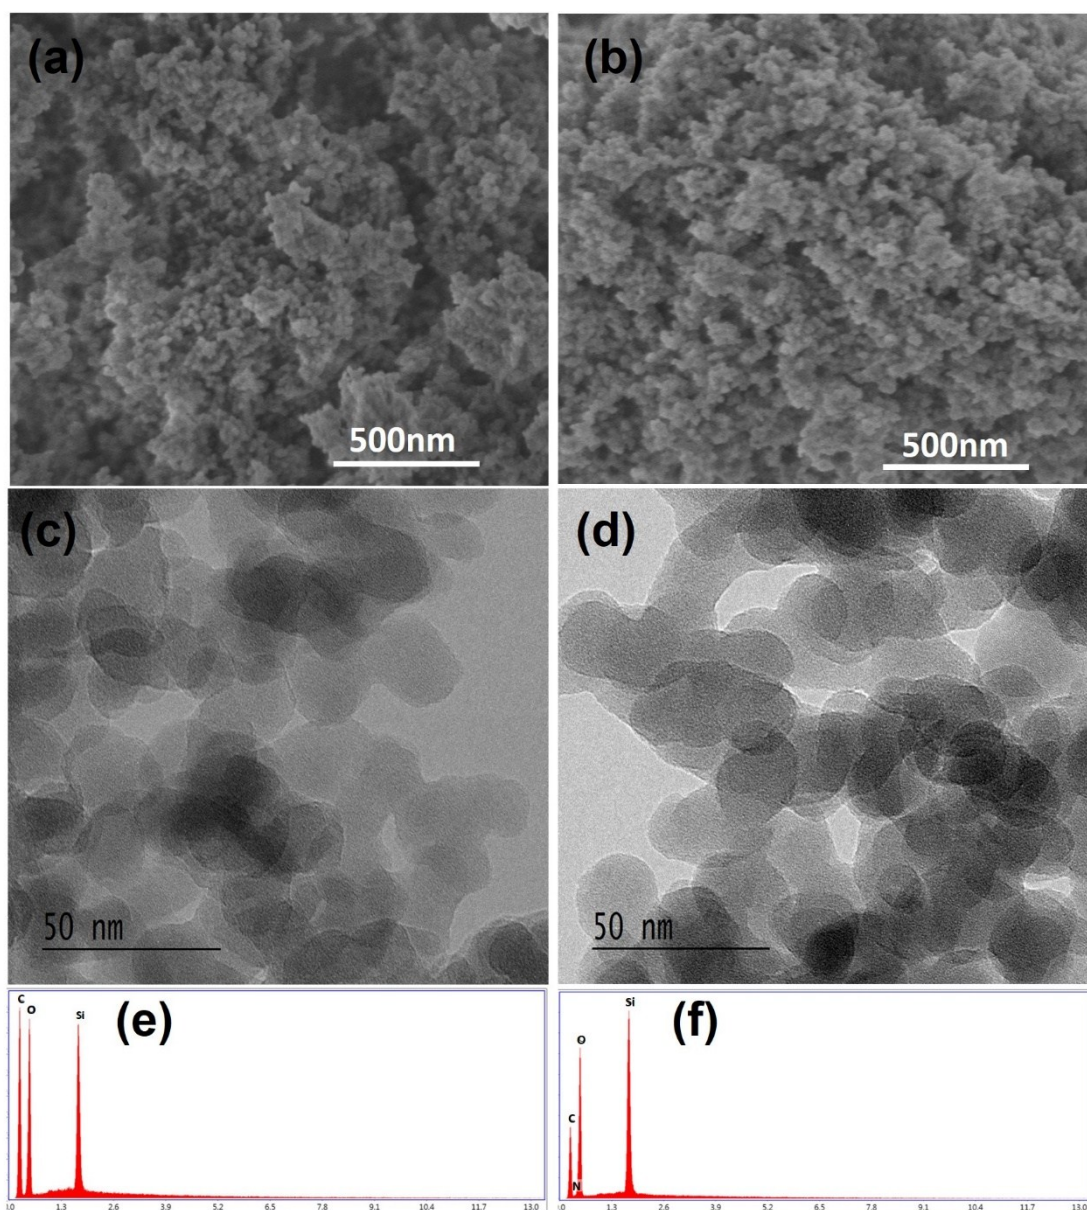

**Figure S1** SEM (a, b), TEM (c, d) and EDS (e, f) of the silica particles of S<sub>0</sub> (a, c, e) and S<sub>3</sub> (b, d, f).

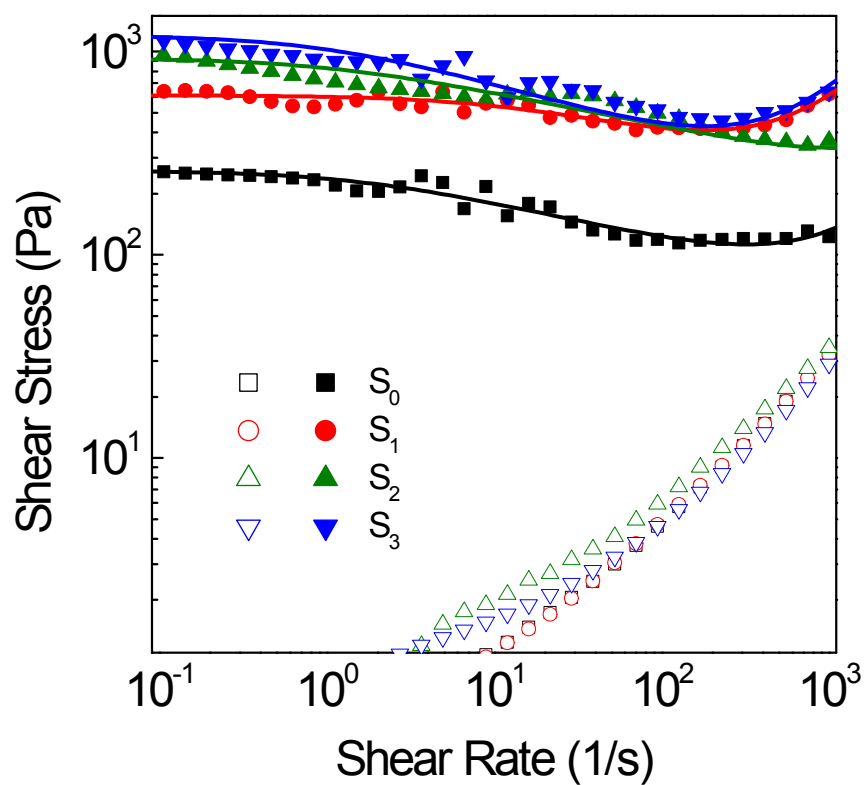

**Figure S2** Shear stress as a function of shear rate for each TER fluids at electric fields of 0 and 4.0 kV/mm.

**Table S1.** Parameters in the equations of CCJ model obtained by fitting the models to the shear stress curves of the TER fluids at various electric fields.

|       | E(kV/mm) | $\tau$ | $\alpha$ | $t_1$ | $\eta_\infty$ | $\beta$ | $t_2$ |
|-------|----------|--------|----------|-------|---------------|---------|-------|
| $S_0$ | 1        | 25.7   | 0.50     | 0.71  | 0.016         | 0.039   | 0.014 |
|       | 2        | 81.3   | 0.15     | 0.61  | 0.011         | 0.12    | 0.23  |
|       | 3        | 163.6  | 0.22     | 0.34  | 0.012         | 0.18    | 0.056 |
|       | 4        | 259.6  | 0.19     | 0.63  | 0.012         | 0.21    | 0.010 |
| $S_1$ | 1        | 70.0   | 0.25     | 0.90  | 0.010         | 0.13    | 0.044 |
|       | 2        | 186.3  | 0.16     | 0.81  | 0.012         | 0.26    | 0.021 |
|       | 3        | 433.0  | 0.16     | 0.87  | 0.012         | 0.75    | 0.029 |
|       | 4        | 609.4  | 0.20     | 0.09  | 0.014         | 0.81    | 0.023 |
| $S_2$ | 1        | 94.2   | 0.19     | 0.35  | 0.0072        | 0.14    | 0.80  |
|       | 2        | 276.4  | 0.11     | 0.36  | 0.0081        | 0.14    | 0.61  |
|       | 3        | 606.1  | 0.17     | 0.73  | 0.014         | 0.61    | 0.60  |
|       | 4        | 928.0  | 0.17     | 0.94  | 0.017         | 0.26    | 0.45  |
| $S_3$ | 1        | 105.3  | 0.098    | 0.17  | 0.0086        | 0.037   | 0.32  |
|       | 2        | 321.5  | 0.21     | 0.19  | 0.012         | 0.32    | 0.10  |
|       | 3        | 804.0  | 0.22     | 0.91  | 0.021         | 0.67    | 0.12  |
|       | 4        | 1204.9 | 0.24     | 0.97  | 0.034         | 0.92    | 0.071 |
